# Supplementary material
Source: PubMed Central journal article supplement (PMC8282305)
Supplement: Westfall_Supplemental.pdf [file Westfall_Supplemental.pdf]

## Supplemental materials for

Wilkinson E, Jetty A, Petterson S, Jabbarpour Y, Westfall JM. Primary care's historic role in vaccination and potential role in COVID-19 immunization programs. *Ann Fam Med*. 2021;19:online. doi: 10.1370/afm.2679.

## Supplemental Figure 1. Percent of Medicare Fee-For-Service Blood Tests and

Vaccinations by Primary Care Physicians, 2017

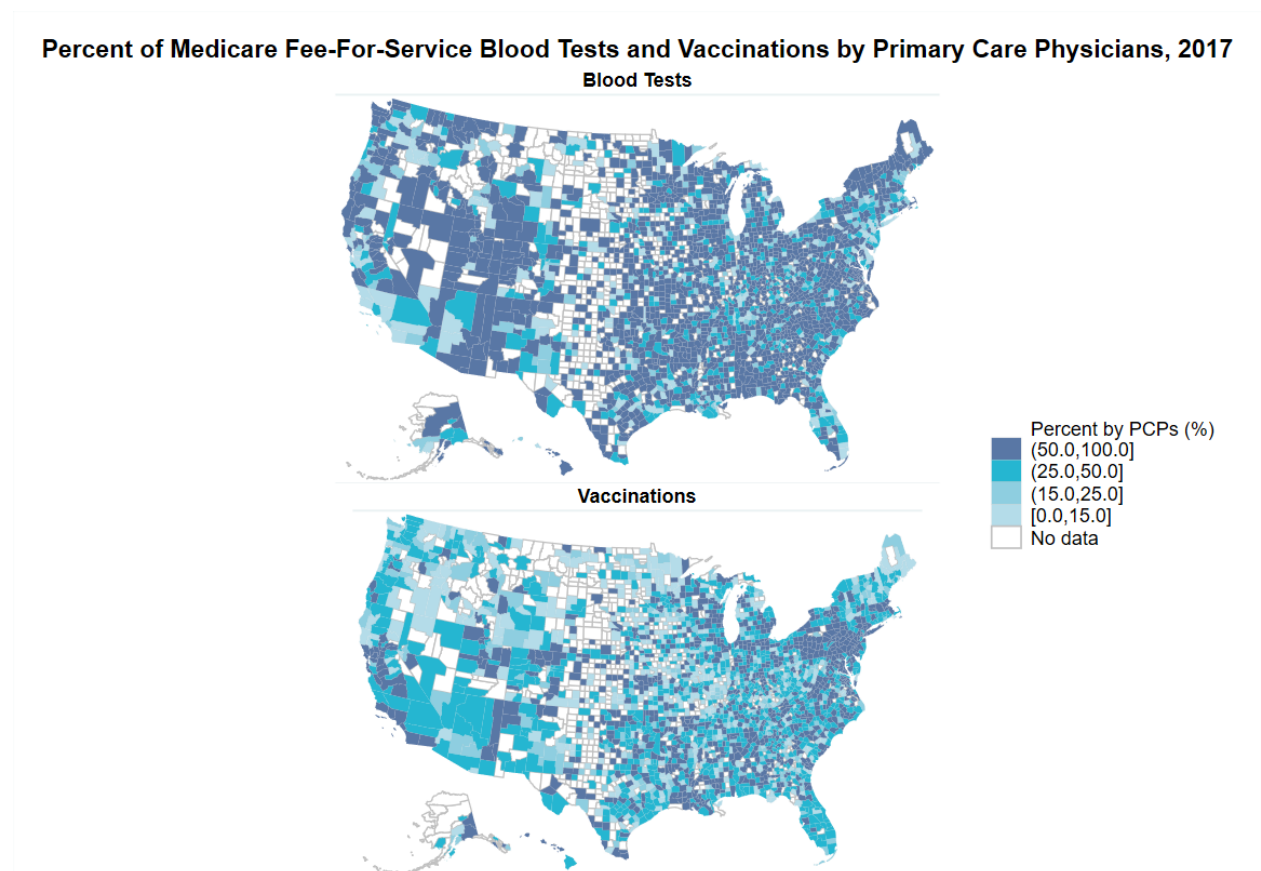

Source: Centers for Medicare and Medicaid Services Medicare Provider Utilization and Payment Data: Physicians and Other Supplier Public Use File, 2017; Centers for Medicare and Medicaid Services National Provider Payment Enumeration System, August 2017 Quarter 3 Update.

PCP: Primary Care Physician.

**Supplemental Table 1. Health Care Common Procedure Coding System Codes Used to Identify Services in CMS Medicare Provider Utilization and Payment Data: Physician and Other Supplier Public Use, 2017**

| Service Type | Healthcare Common Procedure Coding System Codes                                                                                                                                                                  |
|--------------|------------------------------------------------------------------------------------------------------------------------------------------------------------------------------------------------------------------|
| Vaccination  | 90460, 90471, 90472, 90630, 90632, 90654, 90662, 90668, 90670, 90672, 90673, 90685, 90686, 90697, 90714, 90715, 90732, 90740, 90746, 90747, 90749, G0008, G0009, G0010, Q2034, Q2035, Q2036, Q2037, Q2038, Q2039 |

**Supplemental Table 2. ICD-9 Codes, ICD-10 Codes, and Medical Provider Questions Used to Identify Services in Medical Expenditure Panel Survey, 2013-2017**

| Service Type | ICD-9 Codes (2013-2015) | ICD-10 Codes (2016-2017) | Medical Provider Question                          |
|--------------|-------------------------|--------------------------|----------------------------------------------------|
| Vaccination  | V03, V04, V05, V06      | Z23                      | "This visit, did patient receive an immunization?" |
